# Supplementary material
Source: publisher figshare collection journal article supplement (https://diabetesjournals.figshare.com/ndownloader/files/24552701)
Supplement: Supplementary file 1 [file 24552701]

**Sitagliptin treatment at the time of hospitalization was associated with reduced mortality in patients with Type 2 Diabetes and COVID-19: a multicenter case-control retrospective observational study**

Sebastiano Bruno Solerte<sup>1,2#</sup>, Francesca D'Addio<sup>3#</sup>, Roberto Trevisan<sup>4</sup>, Elisabetta Lovati<sup>5</sup>, Antonio Rossi<sup>6</sup>, Ida Pastore<sup>6</sup>, Marco Dell'Acqua<sup>6</sup>, Elio Ippolito<sup>3</sup>, Cristiana Scaranna<sup>4</sup>, Rosalia Bellante<sup>4</sup>, Silvia Galliani<sup>4</sup>, Alessandro Roberto Dodesini<sup>4</sup>, Giuseppe Lepore<sup>4</sup>, Francesca Geni<sup>1,2</sup>, Roberta Maria Fiorina<sup>3</sup>, Emanuele Catena<sup>7</sup>, Angelo Corsico<sup>8</sup>, Riccardo Colombo<sup>7</sup>, Marco Mirani<sup>9</sup>, Carlo De Riva<sup>10</sup>, Salvatore Endrio Oleandri<sup>11</sup>, Reza Abdi<sup>12</sup>, Joseph V. Bonventre<sup>12</sup>, Stefano Rusconi<sup>13</sup>, Franco Folli<sup>14</sup>, Antonio Di Sabatino<sup>5</sup>, Gianvincenzo Zuccotti<sup>15</sup>, Massimo Galli<sup>13</sup> and Paolo Fiorina<sup>3,6,16\*</sup>

<sup>1</sup>Department of Internal Medicine, Geriatric and Diabetology Unit, University of Pavia, Italy;

<sup>2</sup>School of Geriatrics, University of Pavia ASP-Pavia; <sup>3</sup>International Center for T1D, Pediatric Clinical Research Center Romeo ed Enrica Invernizzi, DIBIC L. Sacco, Università degli Studi di Milano, Milan, Italy; <sup>4</sup>UOC Malattie Endocrine 1-Diabetologia, Ospedale Papa Giovanni XXIII ASST- PG XXIII, Bergamo, Italy; <sup>5</sup>Internal Medicine Unit, University of Pavia and IRCCS Policlinico San Matteo, Pavia, Italy; <sup>6</sup>Division of Endocrinology, ASST Fatebenefratelli-Sacco, Milan, Italy; <sup>7</sup>Department of Anesthesia and Intensive Care Unit, ASST Fatebenefratelli Sacco, Luigi Sacco Hospital, Università degli Studi di Milano, Milan, Italy; <sup>8</sup>Pneumology Unit, Fondazione IRCCS Policlinico San Matteo and Department of Internal Medicine and Therapeutics, University of Pavia, Pavia, Italy; <sup>9</sup>Metabolic Disease and Diabetes, Humanitas Research Hospital, Rozzano, Milan, Italy;

<sup>10</sup>UO Malattie Endocrine ULSS3-Ospedale dell'Angelo Mestre, Mestre, Italy; <sup>11</sup>Department of Endocrinology and Metabolism, ASL Città di Torino, Torino, Italy; <sup>12</sup>Nephrology Division, Brigham and Women's Hospital, Boston, MA; <sup>13</sup>Department of Biomedical and Clinical Sciences 'Luigi Sacco', University of Milan, and III Division of Infectious Diseases, ASST Fatebenefratelli Sacco, Luigi Sacco Hospital, Milan, Italy; <sup>14</sup>Endocrinology and Metabolism, Department of Health Science, Università di Milano, ASST Santi Paolo e Carlo, Milan, Italy; <sup>15</sup>Pediatric Clinical Research Center Romeo ed Enrica Invernizzi, DIBIC, Università di Milano and Department of Pediatrics, Buzzi Children's Hospital, Milan, Italy; <sup>16</sup>Nephrology Division, Boston Children's Hospital, Harvard Medical School, Boston, MA, USA.

\*Corresponding author; #Co-first author.

## **SUPPLEMENTAL TEXT**

### **SUPPLEMENTAL FIGURE 1-2**

## SUPPLEMENTAL FIGURE

**Supplemental Figure 1. Sub-analysis of clinical outcomes in sitagliptin-treated patients and in the standard-of-care group.**

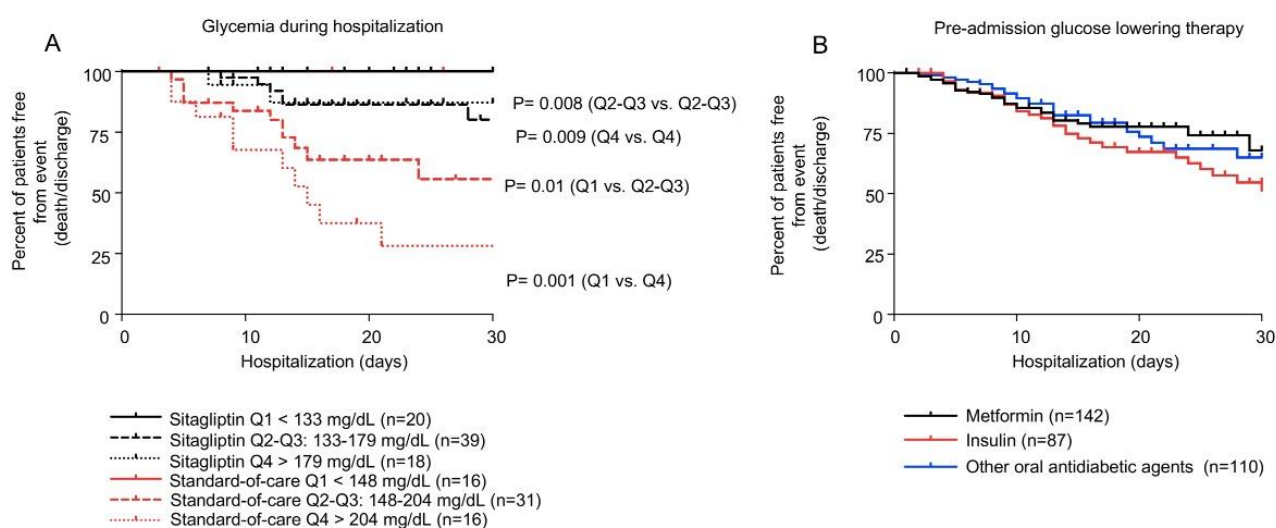

**(A)** Time to clinical endpoint (death/hospital discharge) in sitagliptin-treated patients and in the standard-of-care group grouped according to mean blood glucose level quartiles calculated in each group. **(B)** Time to clinical endpoint (death/hospital discharge) in sitagliptin-treated patients and in the standard-of-care group grouped according to the pre-admission lowering glucose therapy.

**Abbreviations:** Q, quartile; n, number of patients.

**Supplemental Figure 2. Change in the clinical score at 30 days of follow-up in the sitagliptin-treated and standard-of-care patient groups.**

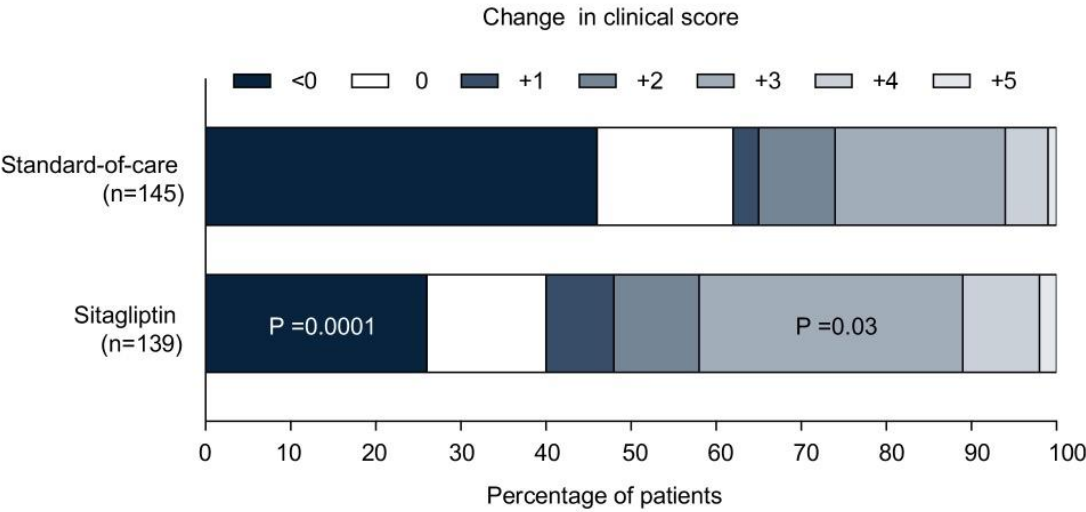

Bar graph depicting the percentages of patients assessed for clinical outcome at follow-up, grouped according to their scores of clinical improvements. Scores ranged from worsened outcome to improvement of 1-5 points as compared to baseline clinical outcome analysis. The modified seven-point ordinal scale used is described in the Methods section.
